# Supplementary material for: Structure-engineering the stability, electronic, optical and photocatalytic properties of hexagonal C2P2monolayers
Source: Royal Society of Chemistry journal article supplement (doi:10.1039/d3cp00484h), 2023-01-01
Supplement: d3cp00484h1.pdf [file d3cp00484h1.pdf]

## Support Information

**Table SI.**

|          | CP-1   | CP-2   | CP-3   | CP-4   | CP-5   | CP-6   |
|----------|--------|--------|--------|--------|--------|--------|
| $D_a$    | 0.382% | 0.368% | 0.175% | 0.175% | 0.261% | 0.268% |
| $D_{TE}$ | 0.071% | 0.068% | 0.066% | 0.066% | 0.068% | 0.067% |

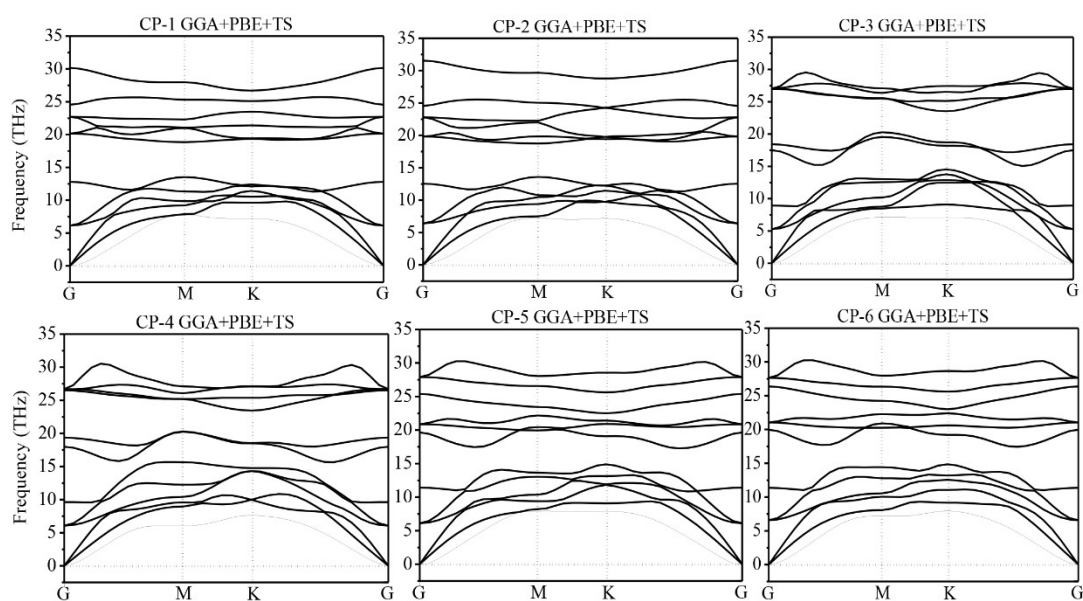

**Fig. S1** (a)-(d) The phonon spectrum of all  $C_2P_2$  monolayers with considering van der Waals dispersion correction.

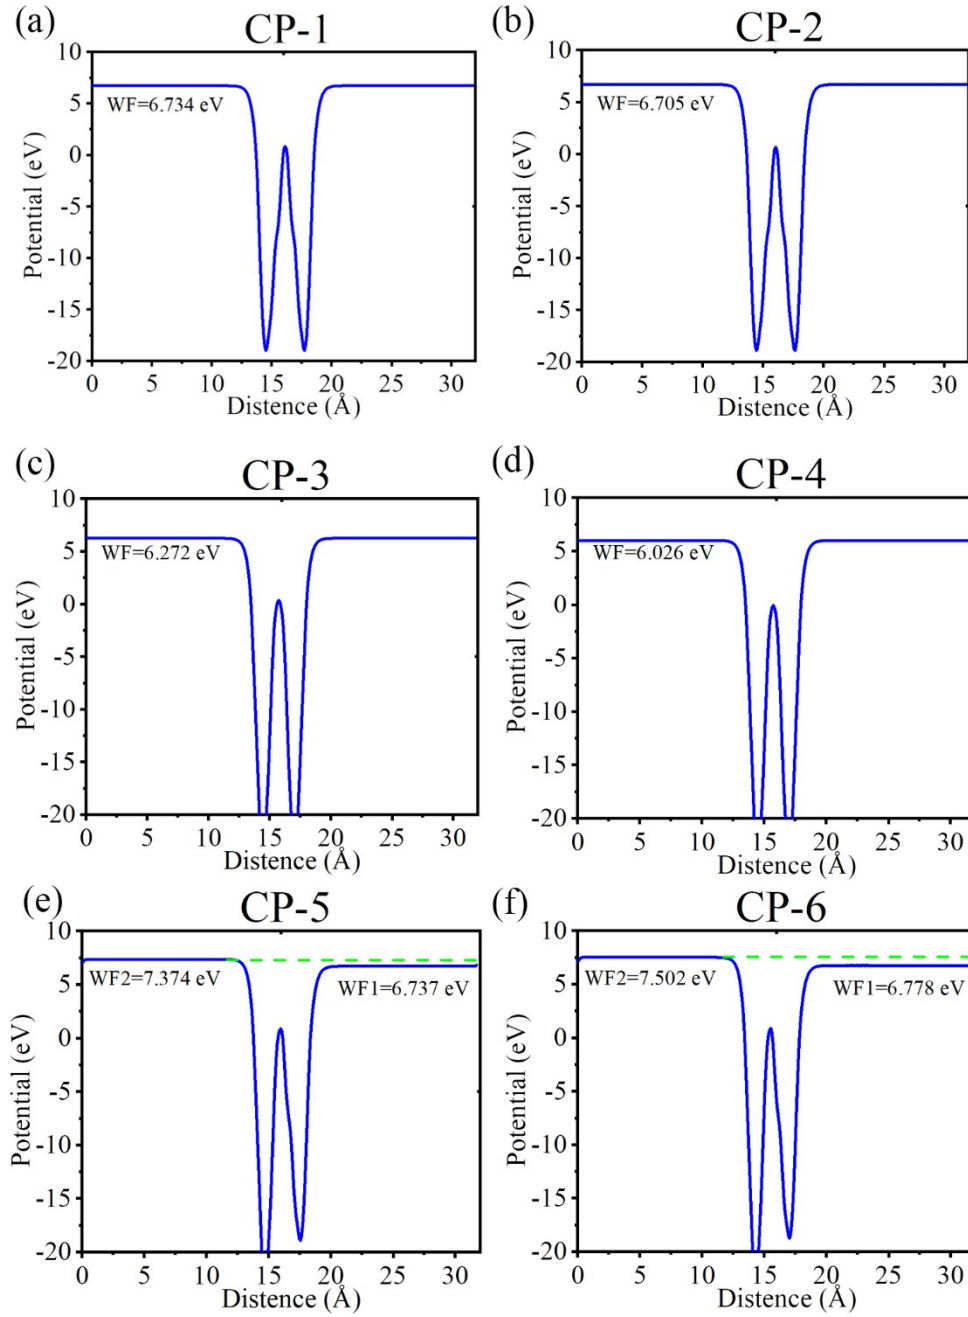

**Fig. S2** (a) - (d) The Plane-averaged electrostatic potential of non-Janus  $C_2P_2$  monolayers, where the work functions are donated as 6.734 eV, 6.705 eV, 6.272 eV and 6.026 eV, respectively. (e)-(f) The Plane-averaged electrostatic potential of Janus  $C_2P_2$  monolayers,

Where, due to the build-in electric field of Janus  $C_2P_2$  monolayers, the work functions of CP-5 are 7.374 and 6.737 for VBM and CBM, respectively, and the work functions of CP-6 are 7.502 and 6.778, for VBM and CBM, respectively.

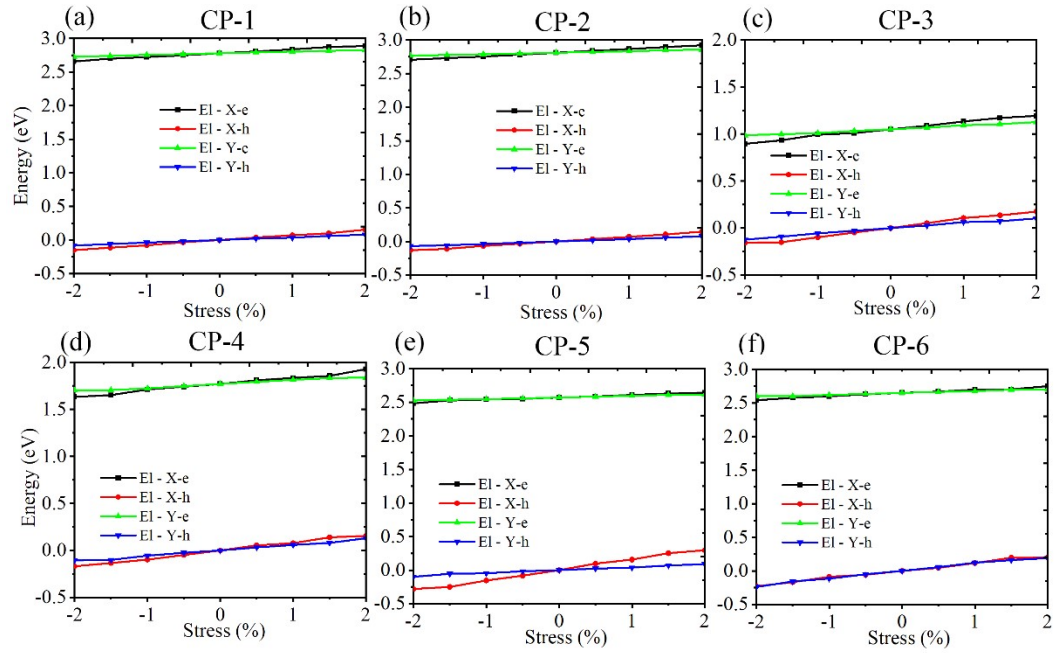

**Fig. S3** (a-f) The Strain effect on the VBM and CBM of monolayer  $C_2P_2$ . The slope of linear fitting of these data represents deformation energies  $El$  (eV).

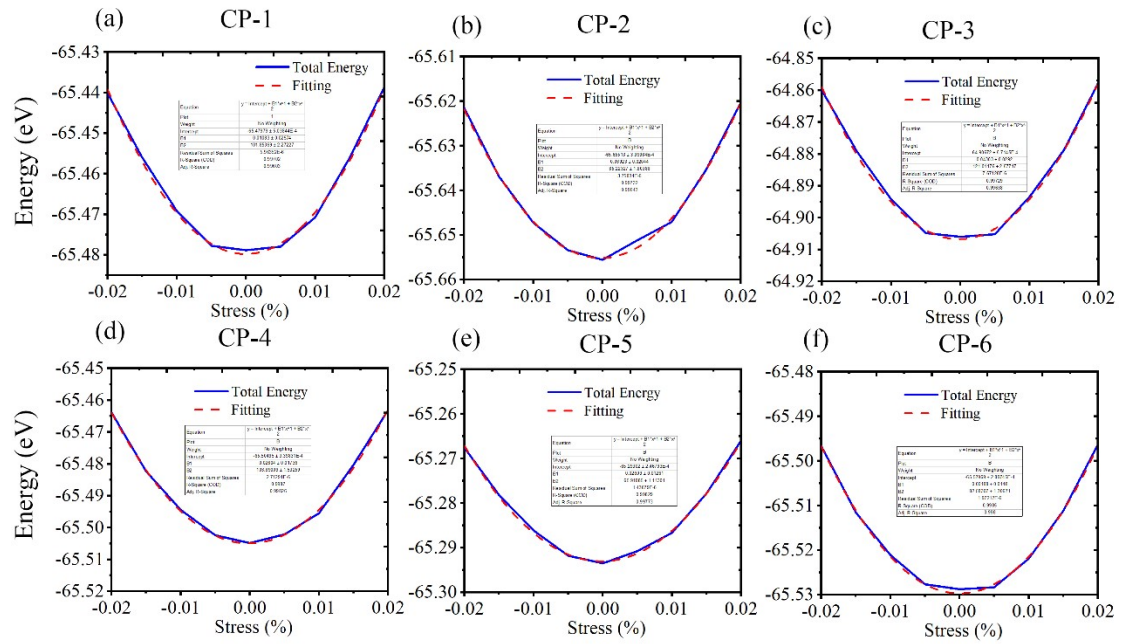

**Fig. S4** (a-f) The Strain along X direction effect on total energy of monolayer  $C_2P_2$ .

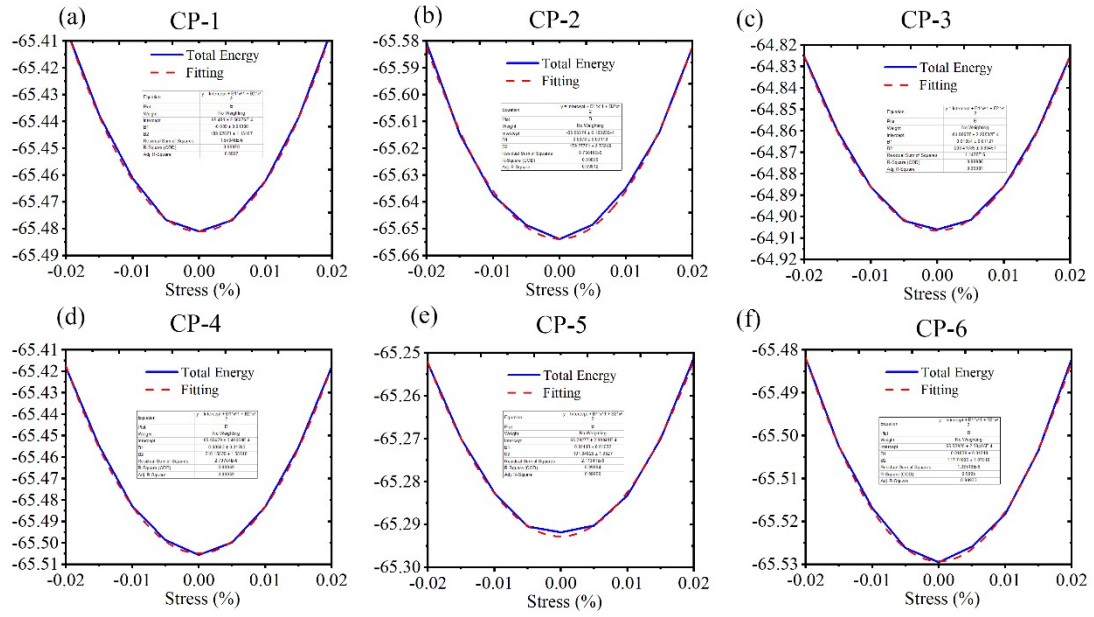

**Fig. S5 (a-f)** The Strain along Y direction effect on total energy of monolayer  $C_2P_2$ .
